# Supplementary material for: Detection of M. tuberculosis DNA in peripheral blood mononuclear cells of tuberculosis contacts does not associate with blood RNA signatures for incipient tuberculosis
Source: PubMed Central journal article supplement (PMC11635380; doi:10.1183/13993003.00479-2024), 2024-12-12

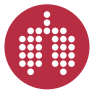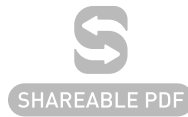

# Detection of *M. tuberculosis* DNA in peripheral blood mononuclear cells of tuberculosis contacts does not associate with blood RNA signatures for incipient tuberculosis

Joshua Rosenheim<sup>1</sup>, Markos Abebe<sup>2</sup>, Mulugeta Belay<sup>2,3</sup>, Begna Tulu<sup>4,5</sup>, Dawit Tayachew<sup>2</sup>, Metasebia Tegegn<sup>2</sup>, Sidra Younis<sup>3,6</sup>, David A. Jolliffe<sup>3</sup>, Abraham Aseffa<sup>2</sup>, Gobena Ameni<sup>7,8</sup>, Stephen T. Reece<sup>9</sup>, Mahdad Noursadeghi<sup>10</sup> and Adrian R. Martineau<sup>3,10</sup>

<sup>1</sup>Division of Infection and Immunity, University College London, London, UK. <sup>2</sup>Armauer Hansen Research Institute, Addis Ababa, Ethiopia. <sup>3</sup>Blizard Institute, Barts and the London School of Medicine and Dentistry, Queen Mary University of London, London, UK. <sup>4</sup>Research Center Borstel, Leibniz Lung Center, Borstel, Germany. <sup>5</sup>Bahir Dar University, Bahir Dar, Ethiopia. <sup>6</sup>National University of Medical Sciences, Rawalpindi, Pakistan. <sup>7</sup>Aklilu Lemma Institute of Pathobiology, Addis Ababa University, Addis Ababa, Ethiopia. <sup>8</sup>Department of Veterinary Medicine, United Arab Emirates University, Al Ain, United Arab Emirates. <sup>9</sup>Infectious Diseases and Vaccines, Kymab, Babraham Research Campus, Cambridge, UK. <sup>10</sup>These authors contributed equally.

Corresponding author: Adrian R. Martineau ([a.martineau@qmul.ac.uk](mailto:a.martineau@qmul.ac.uk))

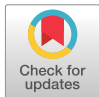

Shareable abstract (@ERSpublications)

**Detection of *M. tuberculosis* DNA in TB contacts' PBMCs does not associate with blood RNA signatures for incipient tuberculosis** <https://bit.ly/4dliODg>

**Cite this article as:** Rosenheim J, Abebe M, Belay M, *et al.* Detection of *M. tuberculosis* DNA in peripheral blood mononuclear cells of tuberculosis contacts does not associate with blood RNA signatures for incipient tuberculosis. *Eur Respir J* 2024; 64: 2400479 [DOI: 10.1183/13993003.00479-2024].

This extracted version can be shared freely online.

Copyright ©The authors 2024.

This version is distributed under the terms of the Creative Commons Attribution Licence 4.0.

Received: 6 March 2024  
Accepted: 5 Aug 2024

*To the Editor:*

Human exposure to *Mycobacterium tuberculosis* (Mtb) is thought to result in a spectrum of outcomes, including bacillary clearance, quiescent Mtb infection, incipient tuberculosis (TB), subclinical TB and active TB [1]. Incipient TB – defined as a prolonged asymptomatic phase of early disease preceding clinical presentation as active disease [2] – may be distinguished from quiescent Mtb infection by detection of host gene expression signatures in blood, whose presence associates with increased risk of progression to active TB [3]. We and others have previously reported detection of Mtb DNA in CD34-positive peripheral blood mononuclear cells (PBMCs) of asymptomatic TB-exposed adults with normal chest radiographs [4–6]. In one such study conducted in Ethiopia [5], administration of isoniazid preventive therapy (IPT) reduced the proportion of HIV-infected individuals in whom this signal was detectable from 95% to 53% ( $p < 0.0001$ ), suggesting that detection of Mtb DNA in PBMCs may represent the presence of viable bacteria. Whether these bacteria provoke a host transcriptional response associated with subclinical disease is not known.

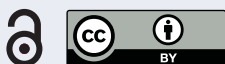

Supplement: ERJ-00479-2024.Shareable.pdf [file ERJ-00479-2024.Shareable.pdf]
